# Supplementary material for: Nitrogen and sulfur co-doped chiral carbon quantum dots with independent photoluminescence and chirality
Source: Royal Society of Chemistry journal article supplement (doi:10.1039/c7qi00118e), 2017-01-01
Supplement: c7qi00118e1.pdf [file c7qi00118e1.pdf]

# Nitrogen and Sulfur Co-doped Chiral Carbon Quantum Dots with Independent Photoluminescence and Chirality

## Supporting Information

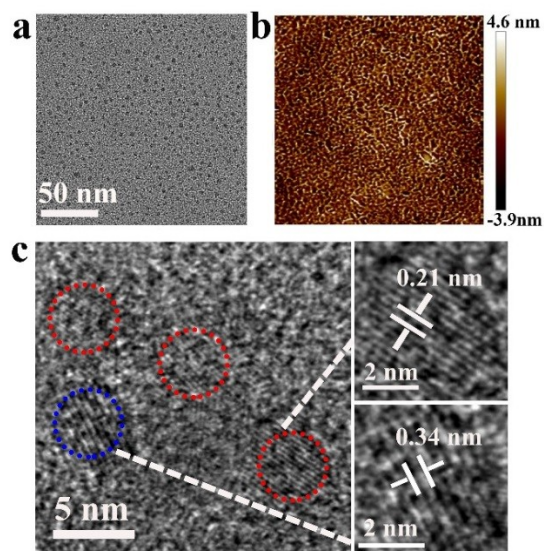

**Fig. S1** TEM (a), AFM (b) and HRTEM (c) images of D-CQDs.

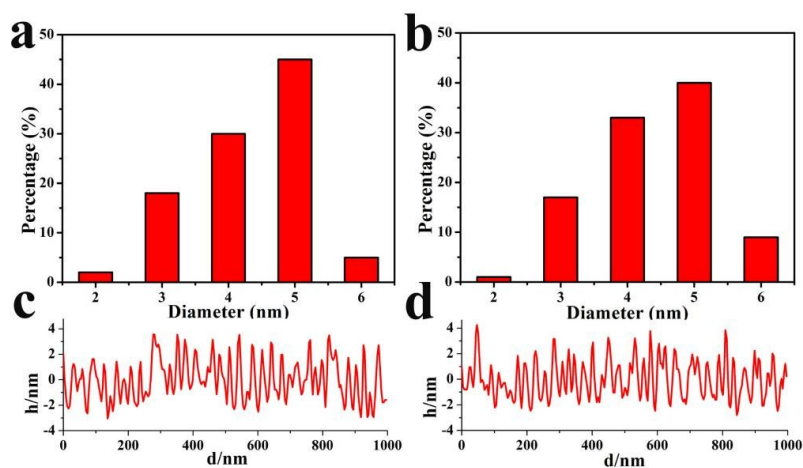

**Fig. S2** Particle size histograms of L-CQDs (a) and D-CQDs (b). Height distributions of L-CQDs (c) and D-CQDs (d).

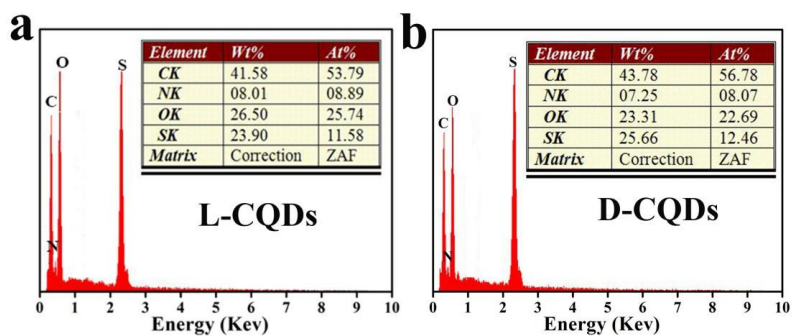

Fig. S3 EDS spectra of (a) L-CQDs and (b) D-CQDs.

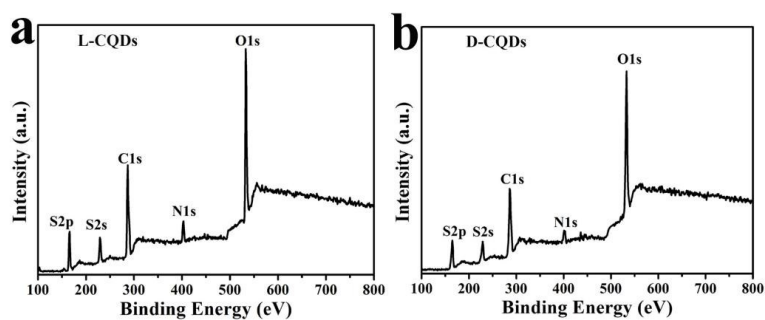

Fig. S4 Full scan XPS survey spectra of L-CQDs (a) and D-CQDs (b).

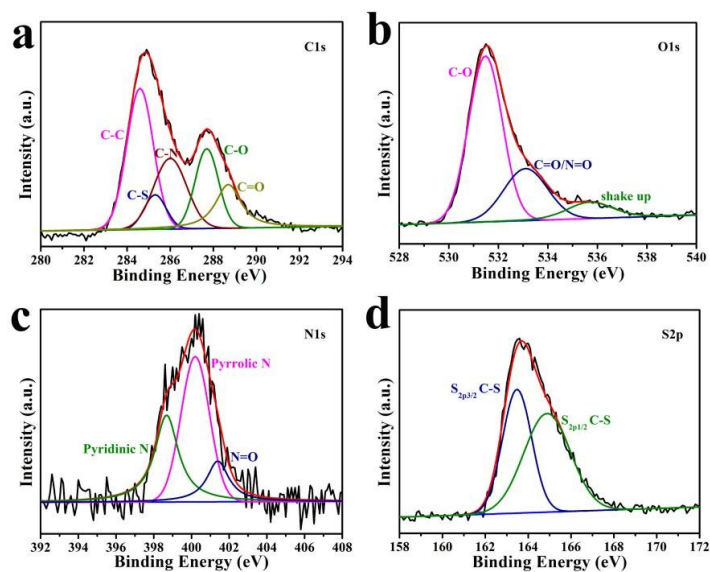

Fig. S5 High-resolution XPS spectra of (a) C 1s; (b) O 1s; (c) N 1s; (d) S 2p of D-CQDs.

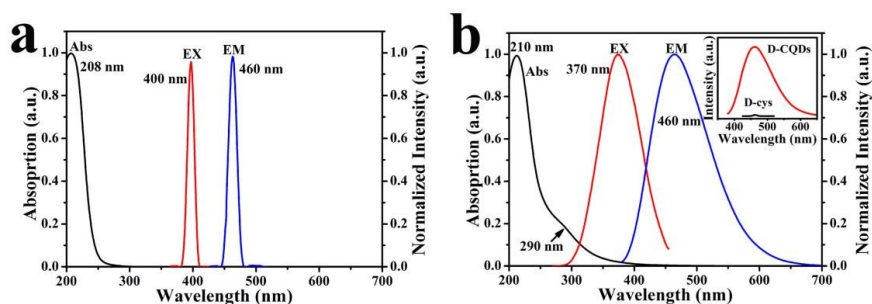

**Fig. S6** (a) UV-vis absorption (black line) and PL excitation (red line) and emission (blue line) spectra of D-cys. (b) UV-vis absorption (black line) and PL excitation (red line) and emission (blue line) spectra of D-CQDs, inset is the emission spectra of D-cys and D-CQDs with excitation wavelength of 400 and 370 nm, respectively.

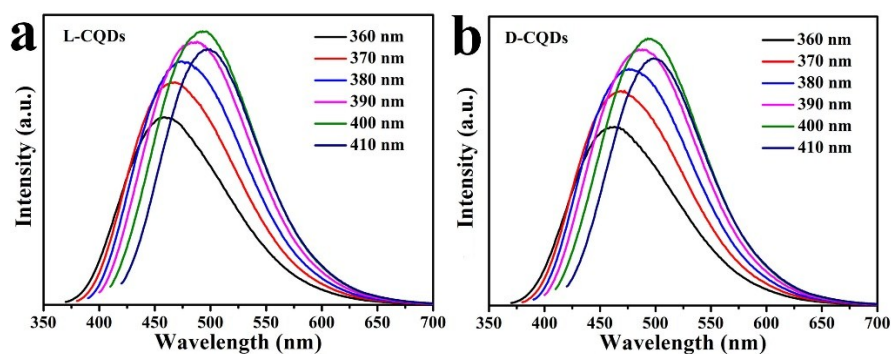

**Fig. S7** PL spectra of L-CQDs (a) and D-CQDs (b) with different excitation wavelength from 360 nm to 400 nm with the increment of 10 nm.

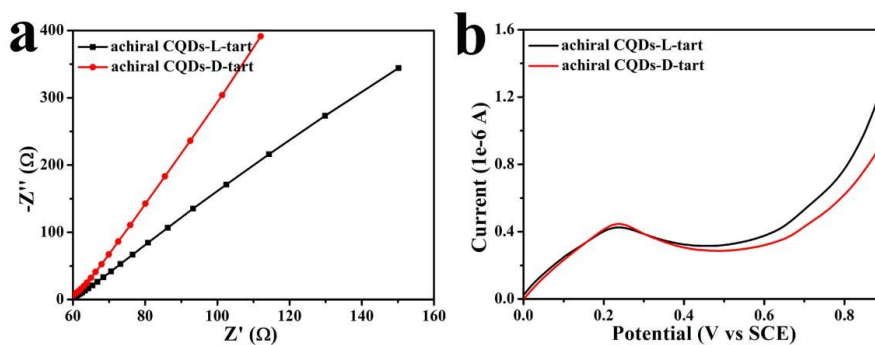

**Fig. S8** (a) EIS spectra of achiral CQDs toward L-tart (black line) and D-tart (red line). (b) LSV curves for oxidation of L-tart (black line) and D-tart (red line) in  $\text{Na}_2\text{SO}_4$  solution at the scan rate of  $10 \text{ mV s}^{-1}$ .

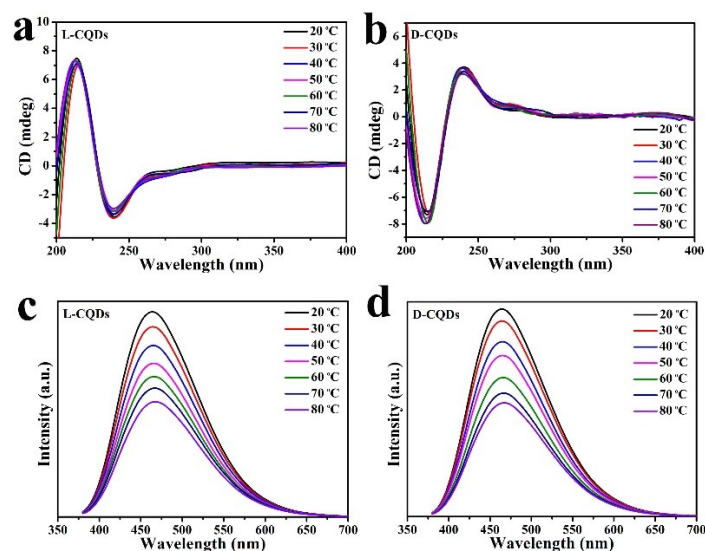

**Fig. S9** CD spectra of L-CQDs (a) and D-CQDs (b) at various temperature from 20 to 80 °C with increment of 10 °C. PL spectra of L-CQDs (c) and D-CQDs (d) with excitation wavelength of 370 nm at various temperature from 20 to 80 °C with increment of 10 °C.

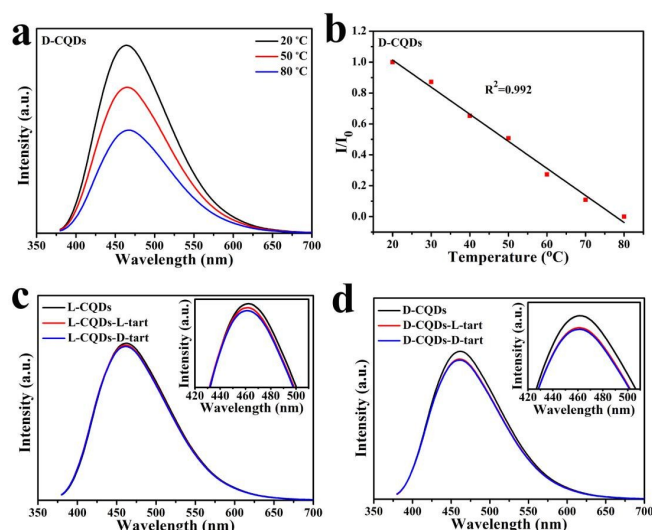

**Fig. S10** (a) PL spectra of D-CQDs at different temperature (20, 50, 80 °C). (b)  $I/I_0$ -T plots of D-CQDs. (c) PL spectra of L-CQDs in 1 mM L or D-tart with excitation wavelength of 370 nm. (d) PL spectra of D-CQDs in 1 mM L or D-tart with excitation wavelength of 370 nm.

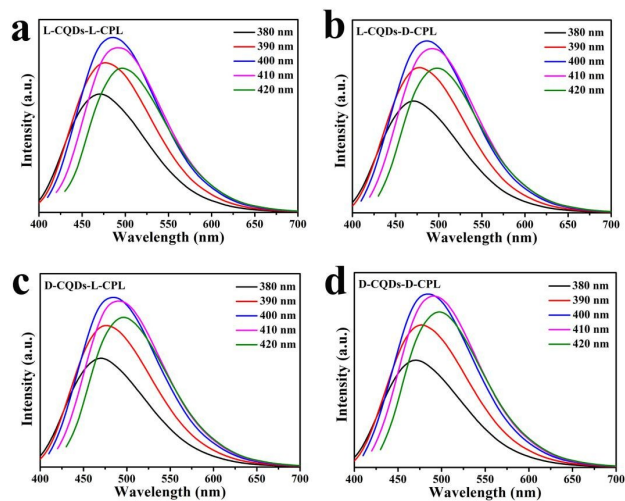

**Fig. S11** PL spectra of L-CQDs excited by L-CPL (a) and D-CPL (b) with different excitation wavelength from 380 to 420 nm with increment of 10 nm. PL spectra of D-CQDs excited by L-CPL (c) and D-CPL (d) with different excitation wavelength from 380 to 420 nm with increment of 10 nm.
